# Supplementary material for: Combination of thrombin-antithrombin complex, plasminogen activator inhibitor-1, and protein C activity for early identification of severe coagulopathy in initial phase of sepsis: a prospective observational study
Source: PubMed Central journal article supplement (PMC4056264; doi:10.1186/cc13190), 2014-01-13

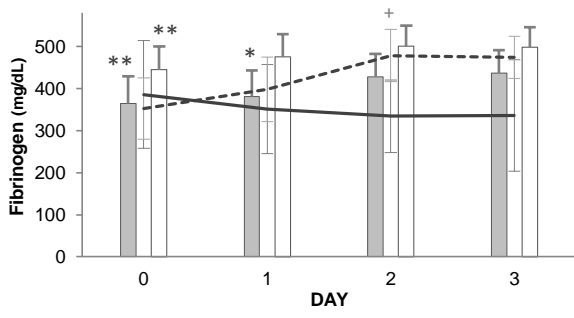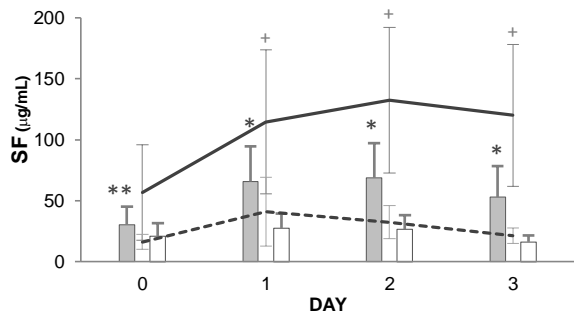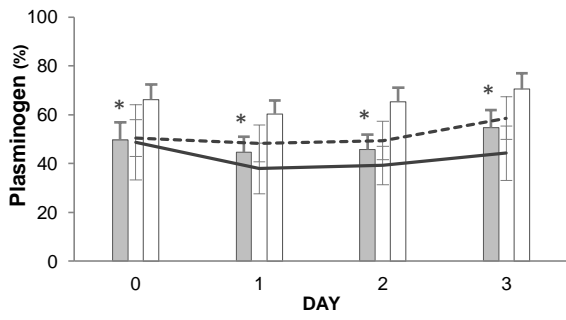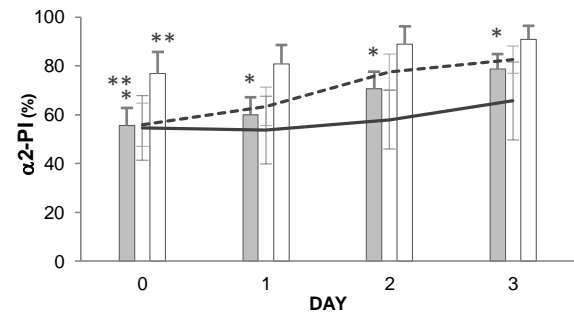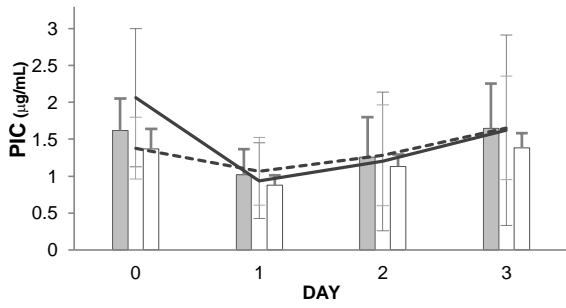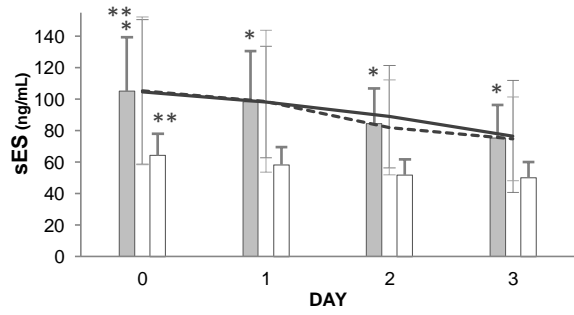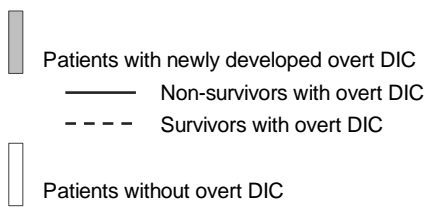

Supplement: cc13190-S1.pdf [file cc13190-S1.pdf]
